# Supplementary material
Source: publisher site journal article supplement (https://cdn.jamanetwork.com/ama/content_public/journal/jama/938480/jus200009supp1_prod.pdf)
Supplement: Supplementary file 1 [file jus200009supp1_prod.pdf]

## Supplementary Online Content

US Preventive Services Task Force. Primary care–based interventions to prevent illicit drug use in children, adolescents, and young adults: US Preventive Services Task Force Recommendation Statement. *JAMA*. doi:10.1001/jama.2020.6774

**eFigure.** US Preventive Services Task Force (USPSTF) Grades and Levels of Evidence

This supplementary material has been provided by the authors to give readers additional information about their work.

**eFigure.** US Preventive Services Task Force (USPSTF) Grades and Levels of Evidence

**What the USPSTF Grades Mean and Suggestions for Practice**

| Grade              | Definition                                                                                                                                                                                                                                   | Suggestions for Practice                                                                                                                                                                        |
|--------------------|----------------------------------------------------------------------------------------------------------------------------------------------------------------------------------------------------------------------------------------------|-------------------------------------------------------------------------------------------------------------------------------------------------------------------------------------------------|
| <b>A</b>           | The USPSTF recommends the service. There is high certainty that the net benefit is substantial.                                                                                                                                              | Offer or provide this service.                                                                                                                                                                  |
| <b>B</b>           | The USPSTF recommends the service. There is high certainty that the net benefit is moderate, or there is moderate certainty that the net benefit is moderate to substantial.                                                                 | Offer or provide this service.                                                                                                                                                                  |
| <b>C</b>           | The USPSTF recommends selectively offering or providing this service to individual patients based on professional judgment and patient preferences. There is at least moderate certainty that the net benefit is small.                      | Offer or provide this service for selected patients depending on individual circumstances.                                                                                                      |
| <b>D</b>           | The USPSTF recommends against the service. There is moderate or high certainty that the service has no net benefit or that the harms outweigh the benefits.                                                                                  | Discourage the use of this service.                                                                                                                                                             |
| <b>I statement</b> | The USPSTF concludes that the current evidence is insufficient to assess the balance of benefits and harms of the service. Evidence is lacking, of poor quality, or conflicting, and the balance of benefits and harms cannot be determined. | Read the Clinical Considerations section of the USPSTF Recommendation Statement. If the service is offered, patients should understand the uncertainty about the balance of benefits and harms. |

**USPSTF Levels of Certainty Regarding Net Benefit**

| Level of Certainty                                                                                                                                                                                                                                                                                                                                                                                            | Description                                                                                                                                                                                                                                                                                                                                                                                                                                                                                                                                                                                 |
|---------------------------------------------------------------------------------------------------------------------------------------------------------------------------------------------------------------------------------------------------------------------------------------------------------------------------------------------------------------------------------------------------------------|---------------------------------------------------------------------------------------------------------------------------------------------------------------------------------------------------------------------------------------------------------------------------------------------------------------------------------------------------------------------------------------------------------------------------------------------------------------------------------------------------------------------------------------------------------------------------------------------|
| <b>High</b>                                                                                                                                                                                                                                                                                                                                                                                                   | The available evidence usually includes consistent results from well-designed, well-conducted studies in representative primary care populations. These studies assess the effects of the preventive service on health outcomes. This conclusion is therefore unlikely to be strongly affected by the results of future studies.                                                                                                                                                                                                                                                            |
| <b>Moderate</b>                                                                                                                                                                                                                                                                                                                                                                                               | The available evidence is sufficient to determine the effects of the preventive service on health outcomes, but confidence in the estimate is constrained by such factors as<br>the number, size, or quality of individual studies.<br>inconsistency of findings across individual studies.<br>limited generalizability of findings to routine primary care practice.<br>lack of coherence in the chain of evidence.<br>As more information becomes available, the magnitude or direction of the observed effect could change, and this change may be large enough to alter the conclusion. |
| <b>Low</b>                                                                                                                                                                                                                                                                                                                                                                                                    | The available evidence is insufficient to assess effects on health outcomes. Evidence is insufficient because of<br>the limited number or size of studies.<br>important flaws in study design or methods.<br>inconsistency of findings across individual studies.<br>gaps in the chain of evidence.<br>findings not generalizable to routine primary care practice.<br>lack of information on important health outcomes.<br>More information may allow estimation of effects on health outcomes.                                                                                            |
| The USPSTF defines certainty as “likelihood that the USPSTF assessment of the net benefit of a preventive service is correct.” The net benefit is defined as benefit minus harm of the preventive service as implemented in a general, primary care population. The USPSTF assigns a certainty level based on the nature of the overall evidence available to assess the net benefit of a preventive service. |                                                                                                                                                                                                                                                                                                                                                                                                                                                                                                                                                                                             |

© 2020 American Medical Association. All rights reserved.
